# Supplementary material for: One-pot synthesis to prepare lignin/photoacid nanohybrids for multifunctional biosensors and photo-triggered singlet oxygen generation
Source: Royal Society of Chemistry journal article supplement (doi:10.1039/d2gc00196a), 2022-01-01
Supplement: d2gc00196a1.pdf [file d2gc00196a1.pdf]

## Supporting Information (SI)

### One-Pot Synthesis to Prepare Lignin/Photoacid Nanohybrid for Multifunctional Biosensor and Photo-Triggered Singlet Oxygen Generation

Ho-Yin TSE<sup>a,b</sup>, Chi Shun Yeung<sup>a\*</sup>, Chun-Yin Lau<sup>a</sup>, Man Yee Cheung<sup>c</sup>, Jianyu Guan<sup>a</sup>,  
Md Khairul Islam<sup>a</sup>, Paul T. Anastas<sup>b\*</sup> and Shao-Yuan Leu<sup>a\*</sup>

<sup>a</sup> Department of Civil & Environmental Engineering, The Hong Kong Polytechnic University, Hong Kong

<sup>b</sup> School of the Environment, Yale University, USA

<sup>c</sup> School of Biomedical Sciences, The Chinese University of Hong Kong, Hong Kong

\*Corresponding author: [csyeung@polyu.edu.hk](mailto:csyeung@polyu.edu.hk)

\*Corresponding author: [paul.anastas@yale.edu](mailto:paul.anastas@yale.edu)

\*Corresponding author: [syleu@polyu.edu.hk](mailto:syleu@polyu.edu.hk), Tel: +852-3400-8322

## Table Content

### Materials

#### Synthesis details and experiments methods

1. Synthesis of meso-tetraphenyl porphyrin (TPP)
2. Synthesis of 5,10,15,20-tetrakis(4-nitrophenyl)-porphyrin (TNPP)
3. Synthesis of 5,10,15,20-(2-phenylphenol) 4-azo-porphyrin (Por-PP)
4. Evaluation of excited state  $pK_a$
5. Cytotoxicity assay
6. Evaluation of singlet oxygen generation

#### Supplementary Table 1

Summary the chemical feeding ratio in the synthesis of AL-Por-PPs and isolated mass yield of the AL-Por-PPs

#### Supplementary Table 2

$^{31}\text{P}$  NMR spectroscopy characterization of alkali lignin

#### Supplementary Table 3

Gel permeation chromatography (GPC) and zeta potential ( $\zeta$ ) analysis for alkali lignin and AL-Por-PPs

#### Supplementary Table 4

Literature comparison of different  $\text{HSO}_3^-$  fluorescent probes by structural building block, reagent involved in synthesis, detection range and response time

#### Supplementary Figure S1

Porphyrin and 2-phenylphenol moieties content determination by UV-vis absorption and photoluminescence calibration method

#### Supplementary Figure S2

$^1\text{H}$  NMR spectroscopy characterization of AL-Por-PP-1

#### Supplementary Figure S3

$^{13}\text{C}$  NMR spectroscopy characterization of AL-Por-PP-1

#### Supplementary Figure S4

Absorption titration of Por-PP to determine the ground-state  $pK_a$

#### Supplementary Figure S5

Fluorescent titration at 430nm for Por-PP to determine the excited-state  $pK_a$

#### Supplementary Figure S6

The hydrodynamic particle size of AL-Por-PP-3 after addition of different anion ions ( $25\mu\text{M}$ ) into PBS buffer solution and mixed for 5 minutes

### **Supplementary Figure S7**

Corresponding FT-IR spectra of AL-Por-PP-3 after treated with different concentration  $\text{HSO}_3^-$  ions.

### **Supplementary Figure S8**

UV-vis absorption spectrum of Por-PP at different pH values

### **Supplementary Figure S9**

Fluorescent spectrum of Por-PP at different pH values

### **Supplementary Figure S10**

UV-vis absorption spectrum of AL-Por-PP-1 at different pH values

### **Supplementary Figure S11**

UV-vis absorption spectrum of AL-Por-PP-3 at different concentration of added  $\text{HSO}_3^-$  ions

### **Supplementary Figure S12**

Heteronuclear single quantum coherence spectroscopy (HSQC)  $^1\text{H}$ - $^{13}\text{C}$  spectrum of AL-Por-PP-2

### **Supplementary Figure S13**

Heteronuclear single quantum coherence spectroscopy (HSQC)  $^1\text{H}$ - $^{13}\text{C}$  spectrum of AL-Por-PP-3

## **Reference**

### **Materials**

Alkali Lignin (AL) was supplied by Shixian Papermaking in Jilin Province, China. The received lignin was fractionated by different solvent, washed by following order of solvents: hexane, methanol and acetone. The washed AL was extracted by THF. The intention of the organic solvent fractionation is mainly for unifying the quality of the alkali lignin and hence improving the repeatability of the work. The alkali lignin was first washed by hexane to remove low molecular weight apolar components; while the solid residue was washed by methanol to remove small polar components. Acetone was used to remove the soluble lignin oligomers.<sup>1,2</sup> Finally, the most abundant fraction was utilized in our process, which is the THF dissolved lignin polymer. After the extraction, THF was removed by vacuum evaporation and the AL solid was collected with the mass yield (~72%) as the synthesis raw material in this study. Benzaldehyde, sodium nitrite, 2-phenylphenol, pyrrole, dimethyl sulfoxide, anhydrous tin (II) chloride, nitric acid, hydrochloric acid, propanoic acid, all anion salts mentioned in the article, cysteine, homocysteine and glutathione were analytical grade and purchased from J&K Chemistry Co. Ltd. Deionized Water (resistivity of  $\geq 18 \text{ M}\Omega \text{ cm}^{-1}$ ) used in our experiments was purified with Millipore water purification system.

### **Synthesis of meso-tetraphenyl porphyrin (TPP)**

Meso-tetraphenyl porphyrin was synthesized using a previously described method with modifications.<sup>3</sup> In a 500 mL three-neck round bottom flask, 4.24 g (40 mmol) of benzaldehyde were dissolved in 200 mL of propanoic acid at 80 °C and the reaction

mixture was magnetically stirred. When the aldehyde was fully dissolved, freshly distilled pyrrole (2.8 mL, 40 mmol) was added to the mixture and brought to reflux for 2 h. The reaction mixture was cooled to room temperature, and then placed in the freezer overnight for porphyrin precipitation. The reaction mixture was vacuum filtered and obtained purple solid was washed with hot deionized water to remove excess acid and water-soluble impurities. The crude product mixture was purified by column chromatography using ethyl acetate with 1% ethanol as the solvent. The purified product yielded a purple solid after reduced pressure rotary evaporation. <sup>1</sup>H NMR (CDCl<sub>3</sub>, 500 MHz) δ: -2.79 (s, 2H, NH), 7.71–7.79 (m, 12H, ArH), 8.71–8.23 (m, 8H, ArH), 8.83 (s, 8H, pyrrole-H); MALDI-TOF: calcd for C<sub>44</sub>H<sub>34</sub>N<sub>8</sub>: m/z 614.25, found: 615.29 [M + H]<sup>+</sup>.

#### **Synthesis of 5,10,15,20-tetrakis(4-nitrophenyl)-porphyrin (TNPP)**

The obtained meso-tetraphenyl porphyrin (2g, 3.237 mmol) was placed in a 500 mL 3-neck round bottom flask, and 100 mL of fuming HNO<sub>3</sub> was added dropwise. The reaction was allowed to perform at room temperature & under N<sub>2</sub> atmosphere with stirring for 40 minutes. The reaction was then quenched with aqueous ammonia solution and washed with warm deionized water until the brown powder settled. The crude product was purified by column chromatography on silica gel using ethyl acetate and anisole (9:1) as eluent. The remained reddish-purple band was collected and re-dissolved in ethyl acetate; the remained silica gel was removed by using suction filtration. The purified product was obtained after reduced pressure rotary evaporation. <sup>1</sup>H NMR (CDCl<sub>3</sub>, 500 MHz) δ: -2.82 (s, 2H, NH), 5.53 (s, 8H, amino-H), 8.40 (d, 8H, J = 8.0 Hz, ArH), 8.67 (d, 8H, J = 8.0 Hz, ArH), 8.82 (s, 8H, pyrrole-H); MALDI-TOF: calcd for C<sub>44</sub>H<sub>34</sub>N<sub>8</sub>: m/z 794.19, found: 795.23 [M + H]<sup>+</sup>.

#### **Synthesis of 5,10,15,20-(2-phenylphenol) 4-azo-porphyrin (Por-PP)**

0.22g (0.34mmol) 5,10,15,20-tetrakis(4-aminophenyl)-porphyrin was added to 10mL 1.2M HCl with vigorous stirring in ice-bath for 30 minutes. A solution of sodium nitrite (0.2g, 2mL) was added dropwise and stirred for one hour to prepare the diazonium salt mixture. 0.26g (1.53mmol) of 2-phenylphenol was dissolved in 10 mL 10% NaOH. When the solution was cooled to 0 °C, it was added dropwise into the diazonium salt mixture for 12 hours reaction in ice-bath. The product was then washed with hot water to remove the salts and the product was purified by column chromatography using ethyl acetate with 10% ethanol as the solvent; the first red color band was collected. The purified product yielded a deep purple solid after reduced pressure rotary evaporation. <sup>1</sup>H NMR (CDCl<sub>3</sub>, 500 MHz) δ: -2.71 (s, 2H, NH), 6.78–8.42 (m, 48H, ArH), 8.95 (s, 8H, pyrrole-H), 13.89 (s, 4H, OH); MALDI-TOF: calcd for C<sub>92</sub>H<sub>62</sub>N<sub>12</sub>O<sub>4</sub>: m/z 1398.5, found: 1399.5 [M + H]<sup>+</sup>.

#### **Evaluation of excited state pK<sub>a</sub>**

Analysis based on the Förster cycle<sup>4</sup> is an indirect method used to approximate excited-state acid–base equilibria based on differences in molar enthalpy between the protonated (ROH) and deprotonated (RO<sup>-</sup>) species and energies of the 0-0 electronic transitions (E<sub>0-0</sub>). This method estimates E<sub>0-0</sub> as the average of the lowest transition energies measured from the normalized absorption and photoluminescence spectra (λ in nm) as a function of energy.

$$\tilde{\nu}_{ROH}(cm^{-1}) = \frac{1}{\frac{\lambda_{ROH}^{abs} + \lambda_{ROH}^{PL}}{2}} \times 1e^7$$

$$\tilde{\nu}_{RO^{-}}(cm^{-1}) = \frac{1}{\frac{\lambda_{RO^{-}}^{abs} + \lambda_{RO^{-}}^{PL}}{2}} \times 1e^7$$

### **Cytotoxicity assay**

HeLa cells were seeded in a 96-well plate ( $1 \times 10^4$  cells/well) and cultivated in DMEM supplemented with 10% FBS and 1% PS. The cells were then incubated at 37 °C in an atmosphere containing 5% CO<sub>2</sub> for 24 h. After 24 h incubation, culture medium in 96-well plate was removed and the HeLa cells were gently washed with PBS. Then, fresh culture medium containing **AL-Por-PP-3** at various concentrations (0, 15, 30, 60, 90, 180 and 360 µg/mL) was added into 96-well plate and incubated for another 24h. After incubation, nanoparticle-containing culture medium was removed and washed with PBS to remove remaining **AL-Por-PP-3**. Pre-warmed fresh culture medium and 20 µL of MTT solution (5 mg/mL) was then added to each well and incubated for 4h. Finally, all solution in well was removed and 150 µL of DMSO was pipetted into each well. The 96-well plate was gently agitated to solubilize purple crystals and mix well. The absorbance of the 96-well plate was measured by microplate reader (Molecular Devices SpectraMax i3X Multimode Microplate Reader) to determine cell viability at a wavelength of 550 nm.

### **Evaluation of singlet oxygen generation**

The singlet oxygen generation capacity of **AL-Por-PP-1** was investigated by the selective singlet oxygen trap molecule 1,3-diphenyl-isobenzofuran (**DPBF**) in ethanol. To evaluate the kinetics of singlet oxygen generation, the mixture solution [**AL-Por-PP-1** (10µg/L) + **DPBF** (50µM)] was irradiated by 600 nm LED light (5 mW cm<sup>-2</sup>), followed by monitoring the absorbance decrease at 414 nm and plotting it as a function of the absorbance vs time.

As a quantitative measurement of the singlet oxygen generation, the quantum yield was calculated using methylene blue (**MB**) as reference<sup>5</sup> with following equation:

$$\Phi(S) = \Phi(R) \left[ \frac{k(S)}{k(R)} \right] \left[ \frac{F(R)}{F(S)} \right] \left[ \frac{PF(R)}{PF(S)} \right]$$

Where  $\Phi(S)$  is the singlet oxygen generation quantum yield of **AL-Por-PP-1**;  $\Phi(R)$  is the singlet oxygen generation quantum yield of **MB** under the conditions of the study in ethanol which is 0.52;  $k$  is the slope of difference in change in absorbance of DPBF (414 nm) along the irradiation time.  $F$  is the absorption correction factor, given as  $F = 1 - 10^{-OD}$  ( $OD$  is optical density at the irradiation wavelength);  $PF$  is incident light intensity (photonic flux in mW/cm<sup>2</sup>).

To examine the photostability of **AL-PP-Por-1** nanoparticle and the **DPBF** under the

irradiation, the **AL-PP-Por-1** nanoparticle solution and **DPBF** solution were separately irradiated under same light source. The change of UV-Vis absorption intensities at 414 nm were monitoring along time.

### Supplementary table 1

**Summary the chemical feeding ratio in the synthesis of AL-Por-PPs and isolated mass yield of the AL-Por-PPs**

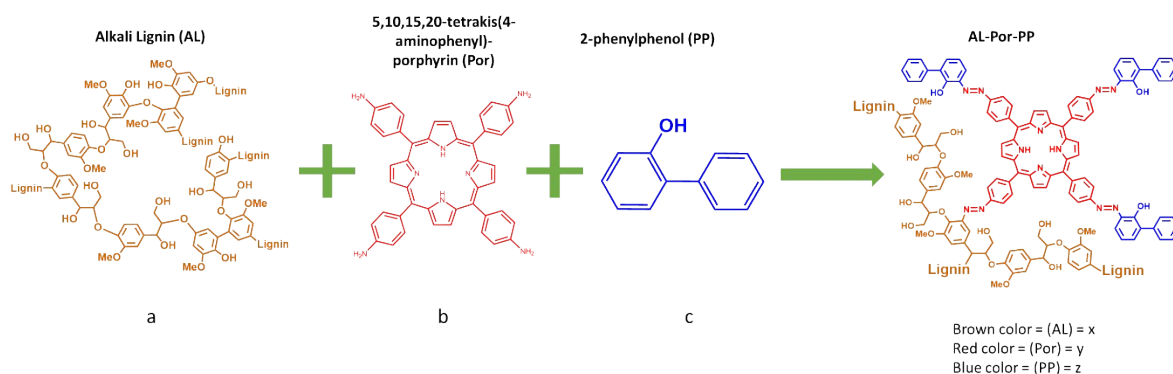

| Products    | Feed ratio<br>a : b : c<br>(mass %) | Experimental<br>x : y : z<br>(mass %) | Isolated yield |
|-------------|-------------------------------------|---------------------------------------|----------------|
| AL-Por-PP-1 | 0.55 : 0.25 : 0.20                  | 0.59 : 0.23 : 0.18                    | 83 %           |
| AL-Por-PP-2 | 0.65 : 0.19 : 0.16                  | 0.65 : 0.18 : 0.14                    | 85 %           |
| AL-Por-PP-3 | 0.75 : 0.14 : 0.11                  | 0.75 : 0.14 : 0.11                    | 86 %           |

## **Supplementary table 2**

### **<sup>31</sup>P NMR spectroscopy characterization of alkali lignin**

<sup>31</sup>P nuclear magnetic resonance (NMR) spectroscopy analysis to characterize the hydroxyl moieties<sup>6</sup> on the **unfractionated alkali lignin & fractionated alkali lignin used for synthesis:**

| Moiety                   | <sup>31</sup> P mmol g <sup>-1</sup> |                            |
|--------------------------|--------------------------------------|----------------------------|
|                          | unfractionated alkali lignin         | fractionated alkali lignin |
| Total -OH                | 5.47                                 | 5.22                       |
| Aliphatic -OH            | 1.59                                 | 2.30                       |
| Total phenolic -OH       | 3.47                                 | 2.64                       |
| 5-free G unit -OH        | 1.66                                 | 1.05                       |
| 5-substituted G unit -OH | 1.54                                 | 1.48                       |
| H Unit -OH               | 0.27                                 | 0.11                       |
| -COOH                    | 0.41                                 | 0.28                       |

The numbers reported above are the mean value of three replicates within =5% of error to the mean.

**Supplementary table 3****Gel permeation chromatography (GPC) and zeta potential ( $\zeta$ ) analysis for alkali**

| Products          | $M_w$ (g.mol <sup>-1</sup> ) | $M_n$ (g.mol <sup>-1</sup> ) | $M_w/M_n$ | $\zeta$ (mv)    |
|-------------------|------------------------------|------------------------------|-----------|-----------------|
| Unfractionated AL | 5476                         | 846                          | 6.47      | -36.8 $\pm$ 2.8 |
| Fractionated AL   | 12582                        | 1418                         | 8.87      | -37.4 $\pm$ 2.8 |
| AL-Por-PP-1       | 5782                         | 621                          | 9.31      | -38.9 $\pm$ 3.5 |
| AL-Por-PP-2       | 5568                         | 688                          | 8.09      | -37.2 $\pm$ 3.2 |
| AL-Por-PP-3       | 5331                         | 747                          | 7.13      | -36.3 $\pm$ 3.3 |

**lignin and AL-Por-PPs**

Number-average molecular weight ( $M_n$ ) and weight-average molecular weight ( $M_w$ ) determined by GPC in THF using PS standards. Zeta potential ( $\zeta$ ) were measured at pH 7. All the numbers reported above are the mean value of three replicates within =10% of error to the mean.



**Supplementary table 4****Literature comparison of different HSO<sub>3</sub><sup>-</sup> fluorescent probes by structural**

| Probe            | Structural building block of the probes                                                                     | Coupling reagent/catalyst                                          | Detection range  | Response Time | Ref.     |
|------------------|-------------------------------------------------------------------------------------------------------------|--------------------------------------------------------------------|------------------|---------------|----------|
| 1                | 7-(Diethylamino)-2-oxo-2H-chromene-3-carbaldehyde & 1-(1H-benzo[d]imidazol-2-yl) ethanone                   | Piperidine                                                         | 1 – 21 μM        | 10 mins       | 7        |
| 2                | 7-(diethylamino)-3-carbaldehyde-coumarine & d acetophenone                                                  | Pyrrolidine & 1,3-dioxolan-2-ylmethyl-triphenylphosphonium bromide | 0 – 80 μM        | 30 mins       | 8        |
| 3                | 4-hydroxycoumarin & cinnamaldehyde                                                                          | Phosphorus oxychloride & Piperidine                                | 0 – 80 μM        | 26 mins       | 9        |
| 4                | 2-aminobenzenethiol, 2-hydroxy-3-methylbenzoic acid & 2,3,3-trimethyl-1-(propan-3-sulfonyl) indolenine      | Hexamethylenetetramine & Piperidine                                | 0 – 25 μM        | 5 mins        | 10       |
| 5                | 3-Ethyl-2-methyl-1,3-benzothiazol-3-ium Iodide & 8-hydroxyquino-line-5-carbaldehyde                         | Piperidine                                                         | 0 – 10 μM        | 10 mins       | 11       |
| 6                | <i>cis</i> -Dichlorobis(bipyridine)ruthenium (II), 4-bromo-1,10-phenanthroline, 2,4-dinitroaniline & phenol | Conc. HCl, Sodium nitride & reflux                                 | 0 – 70 μM        | 60 mins       | 12       |
| 7                | Ruthenium (III) chloride & 4-Methyl-2,2-bipyridyl-4-carboxaldehyde                                          | By reflux                                                          | 1 – 40 μM        | Not given     | 13       |
| <b>This Work</b> | <b>Alkali lignin, 5,10,15,20-Tetrakis(4-aminophenyl) porphyrin &amp; 2-phenylphenol</b>                     | <b>Conc. HCl &amp; Sodium nitride</b>                              | <b>0 – 20 μM</b> | <b>5 mins</b> | <b>-</b> |

**building block & reagent involved in synthesis, detection range and response time**

## Supplementary Figure S1

### Porphyrin and 2-phenylphenol moieties content determination by UV-vis absorption and photoluminescence calibration method

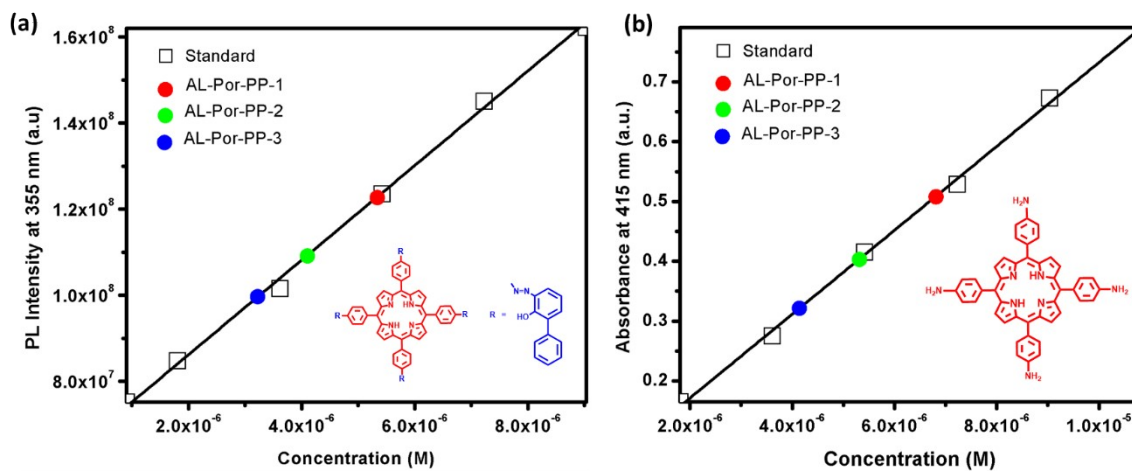

(a) The fluorescent emission of 5,10,15,20-(2-phenylphenol)-(4-aminophenyl)-porphyrin (Por-PP) at 345 nm was recorded in ethanol to calculate the 2-phenylphenol content in AL-Por-PPs.

(b) The absorbance of 5,10,15,20-tetrakis(4-aminophenyl)-porphyrin (TAPP) at 415 nm was measured in ethanol to calculate the porphyrin content in AL-Por-PPs.

**Supplementary Figure S2**

**$^1\text{H}$  NMR spectroscopy characterization of AL-Por-PP-1**

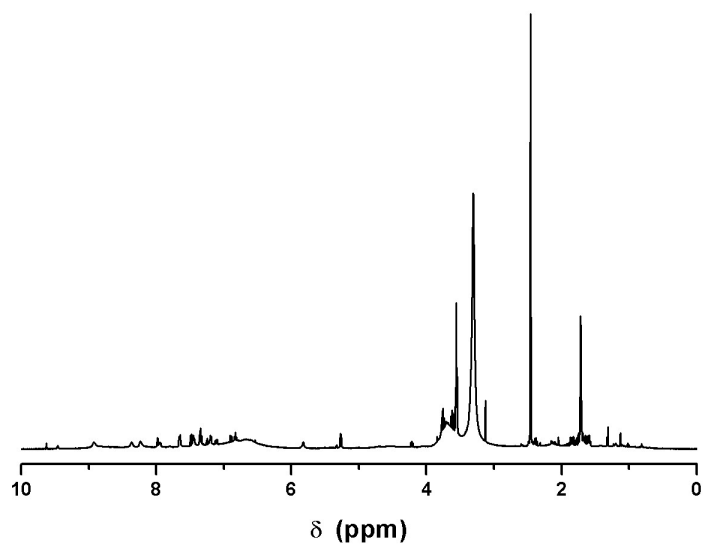

**Supplementary Figure S3**

**$^{13}\text{C}$  NMR spectroscopy characterization of AL-Por-PP-1**

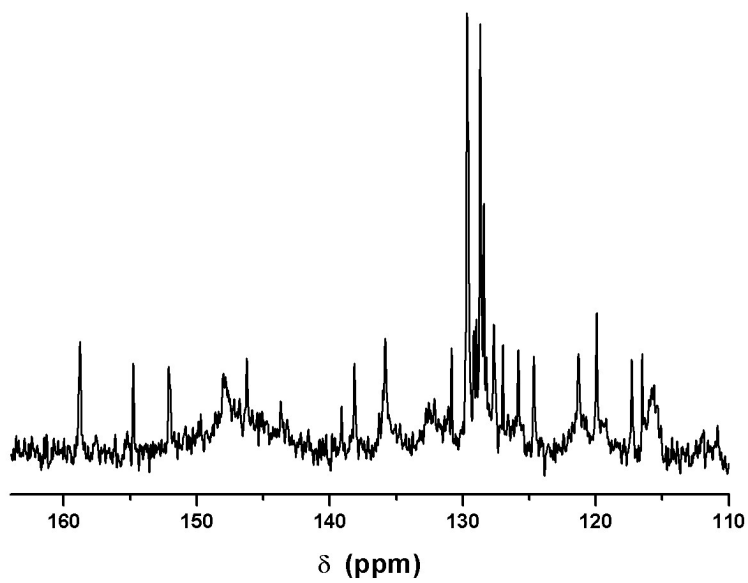

### Supplementary Figure S4

Absorption titration of Por-PP to determine the ground-state pKa

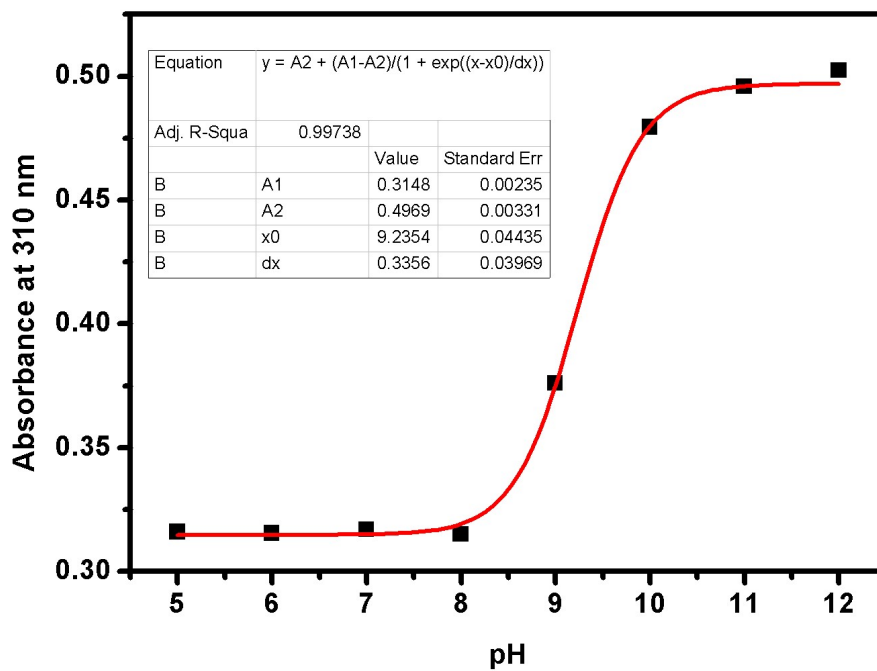

### Supplementary Figure S5

Fluorescent titration at 430nm for Por-PP to determine the excited-state pKa

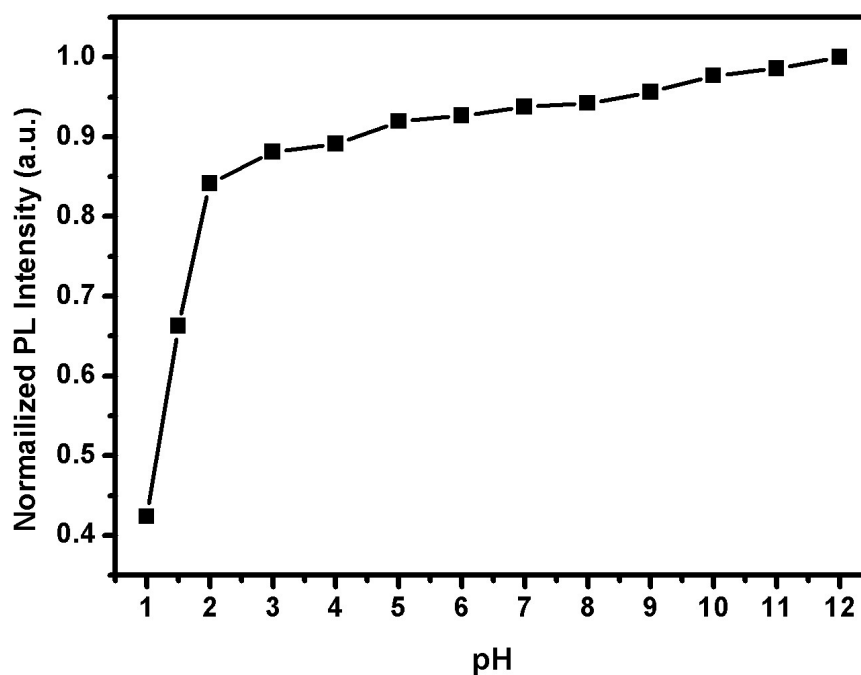

**Supplementary Figure S6**

**The hydrodynamic particle size of AL-Por-PP-3 after addition of different anion ions (25 $\mu$ M) into PBS buffer solution and mixed for 5 minutes**

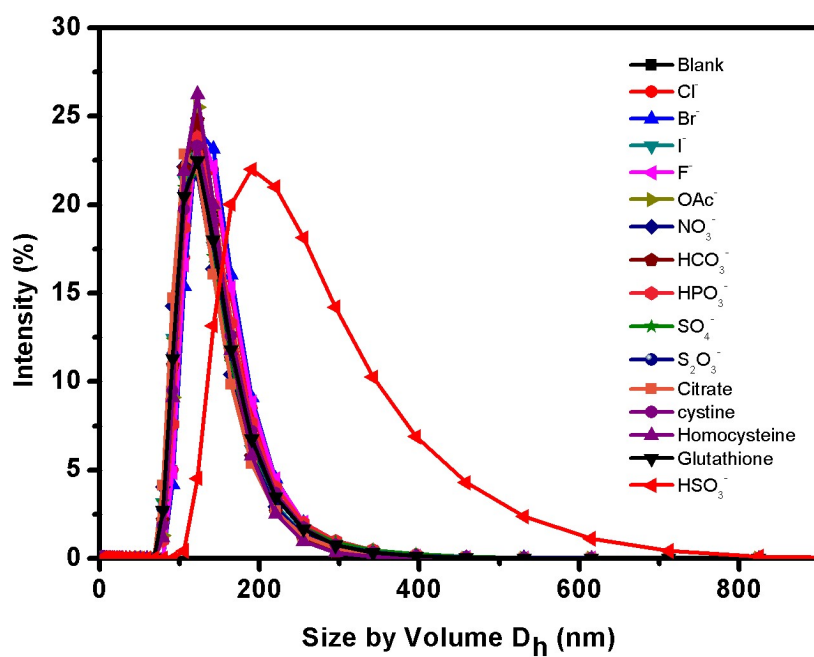

### Supplementary Figure S7

**Corresponding FT-IR spectrum of AL-Por-PP-3 after treated with different concentration  $\text{HSO}_3^-$  ions**

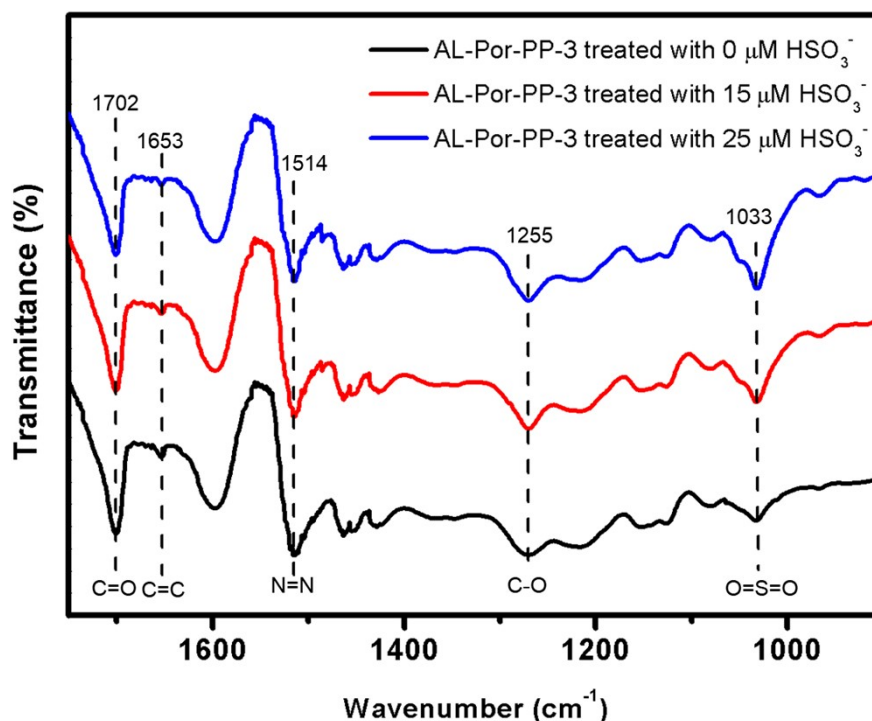

The FT-IR spectrum were collected by the following procedures: 0.1g of AL-Por-PP-3 nanoparticles were mixed with selected concentration  $\text{HSO}_3^-$  ions in the 10 mL PBS buffer solution (pH=7.4) for 5 minutes to make sure the complete of the addition reaction. The mixed solutions were undergone dialysis with the dialysis tube (4-6k Da) with deionized water to remove the excess  $\text{HSO}_3^-$  ions for 48 hours. The solvent was then removed by freeze-dry and the reacted AL-Por-PP-3 nanoparticles were collected. The collected sample particles were mixed with the same amount of KBr powder and pressed into the sample disks for the FT-IR measurement.

**Supplementary Figure S8**

**UV-vis absorption spectrum of Por-PP at different pH values**

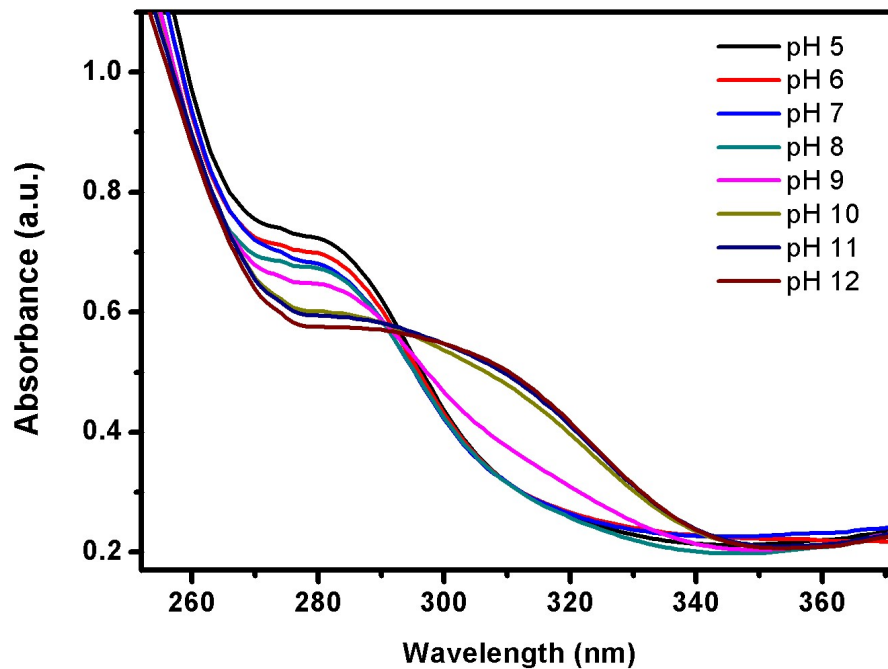

**Supplementary Figure S9**

**Fluorescent spectrum of Por-PP at different pH values**

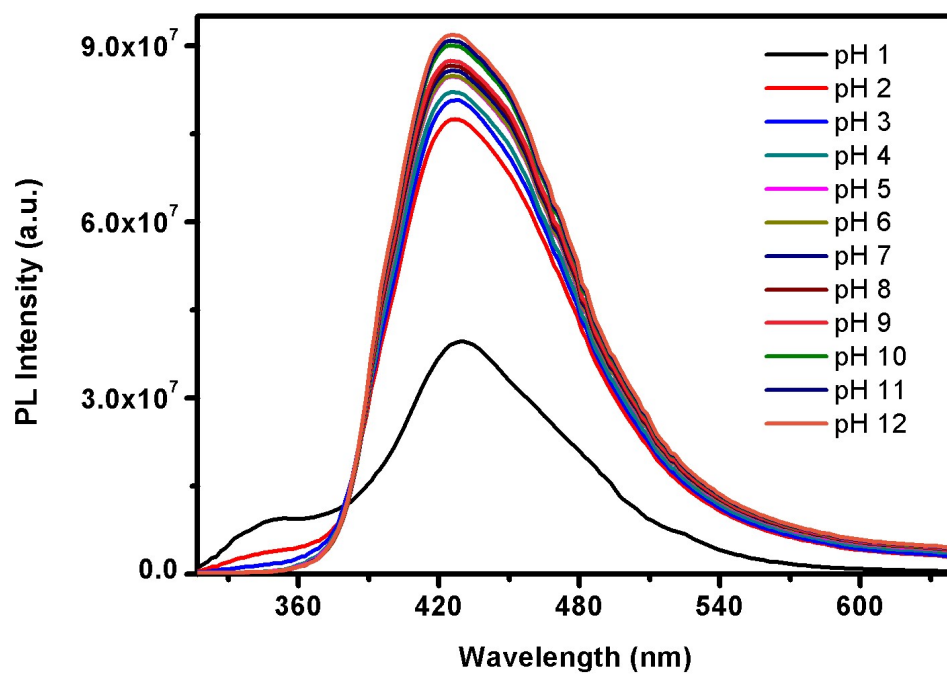

**Supplementary Figure S10**

**UV-vis absorption spectrum of AL-Por-PP-1 at different pH values**



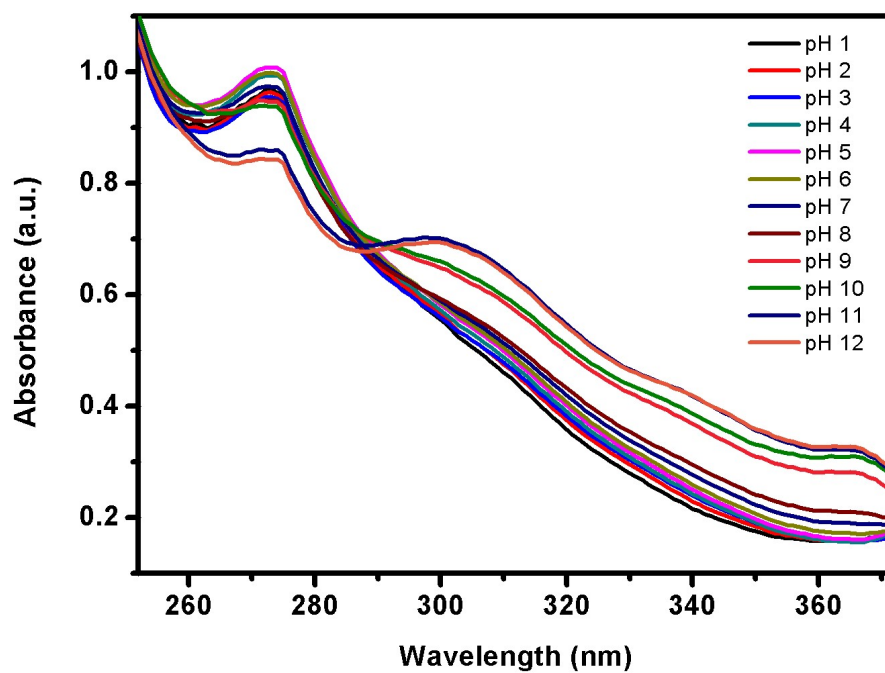

**Supplementary Figure S11**

UV-vis absorption spectrum of AL-Por-PP-3 at different concentration of added  $\text{HSO}_3^-$  ions

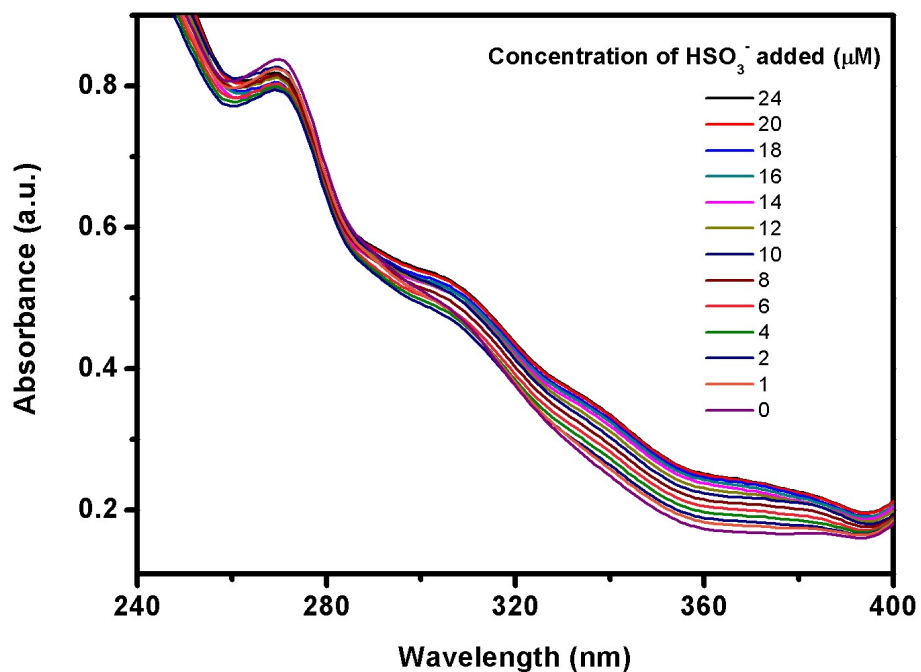

**Supplementary Figure S12**

Heteronuclear single quantum coherence spectroscopy (HSQC)  $^1\text{H}$ - $^{13}\text{C}$

**spectrum of AL-Por-PP-2**

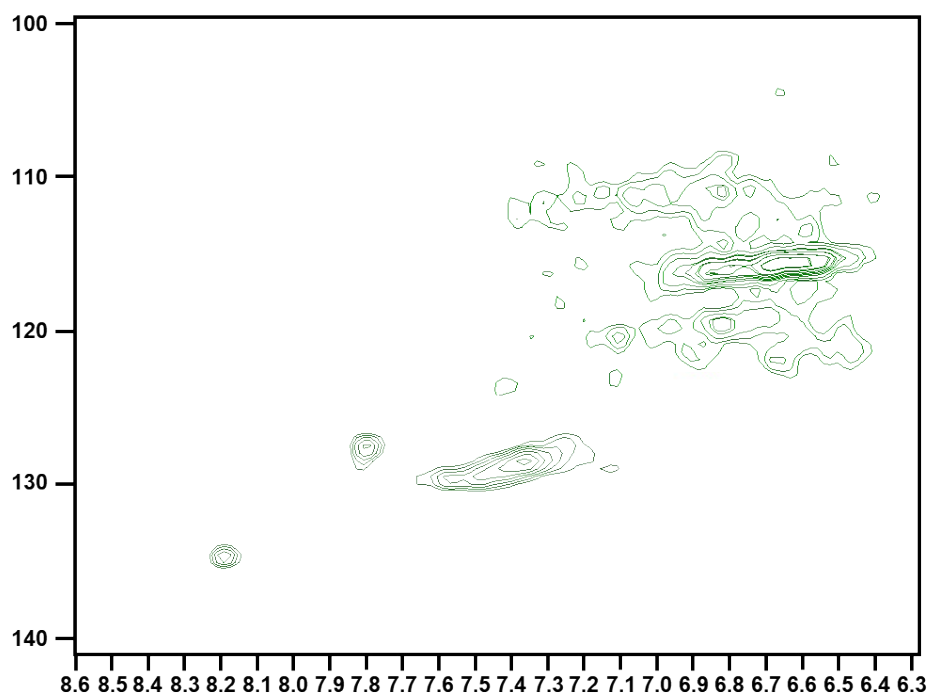

### Supplementary Figure S13

#### Heteronuclear single quantum coherence spectroscopy (HSQC) $^1\text{H}$ - $^{13}\text{C}$ spectrum of AL-Por-PP-3

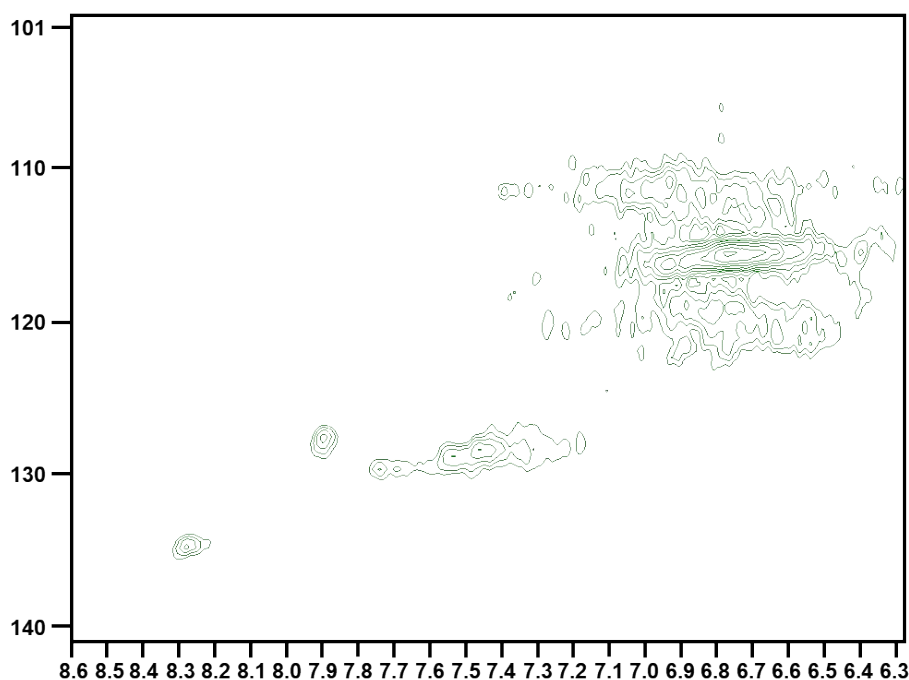

### Reference

1. R. E. Majdar, A. Ghasemian, H. Resalati, A. Saraeian, C. Crestini and H. Lange, *Acs Sustain Chem Eng*, 2020, **8**, 16803-16813.
2. N. Giummarella, P. A. Linden, D. Areskog and M. Lawoko, *Acs Sustain Chem Eng*, 2020, **8**, 1112-1120.
3. P. Rothmund, *J Am Chem Soc*, 1936, **58**, 625-627.
4. B. Marciniak, H. Kozubek and S. Paszyc, *J Chem Educ*, 1992, **69**, 247-249.
5. F. Wilkinson, W. P. Helman and A. B. Ross, *J Phys Chem Ref Data*, 1993, **22**, 113-262.
6. C. Y. Dong, X. Z. Meng, C. S. Yeung, H. Y. Tse, A. J. Ragauskas and S. Y. Leu, *Green Chem*, 2019, **21**, 2788-2800.
7. X. Dai, T. Zhang, Z. F. Du, X. J. Cao, M. Y. Chen, S. W. Hu, J. Y. Miao and B. X. Zhao, *Anal Chim Acta*, 2015, **888**, 138-145.
8. Q. Sun, W. B. Zhang and J. H. Qian, *Talanta*, 2017, **162**, 107-113.
9. J. L. Wang, Y. F. Hao, H. Wang, S. X. Yang, H. Y. Tian, B. G. Sun and Y. G. Liu, *J Agr Food Chem*, 2017, **65**, 2883-2887.
10. H. Y. Zhang, Z. J. Huang and G. Q. Feng, *Anal Chim Acta*, 2016, **920**, 72-79.
11. H. D. Li, *Anal Chim Acta*, 2015, **897**, 102-108.

12. W. Z. Zhang, X. Y. Xi, Y. L. Wang, Z. B. Du, C. L. Liu, J. P. Liu, B. Song, J. L. Yuan and R. Zhang, *Dalton T*, 2020, **49**, 5531-5538.
13. W. Z. Zhang, H. Liu, F. Y. Zhang, Y. L. Wang, B. Song, R. Zhang and J. L. Yuan, *Microchem J*, 2018, **141**, 181-187.
